# Supplementary material for: Yoga and Mindfulness Interventions for Preschool-Aged Children in Educational Settings: A Systematic Review
Source: MDPI journal article supplement (doi:10.3390/ijerph18116091), 2021-06-05
Supplement: s1 [file s1]

## Supplementary Material Appendix S1

### Bibliographic Literature Searching

| Database                                       | Hits |
|------------------------------------------------|------|
| PubMed                                         | 255  |
| EMBASE                                         | 317  |
| PsychInfo                                      | 368  |
| ERIC                                           | 207  |
| Cochrane Central Register of Controlled Trials | 51   |
| American Mindfulness Research Association      | 294  |
| Total                                          | 1492 |

Database: PubMed

Host: PubMed

Date Searched: May-13-2020

Searcher: Yaoyao Sun

### Search Strategy:

| Search Number | Strategy                                                                                           | Records Retrieved | Number combination |
|---------------|----------------------------------------------------------------------------------------------------|-------------------|--------------------|
| 1             | "Yoga"[MeSH Terms]                                                                                 | 2772              |                    |
| 2             | "yoga"[Title/Abstract]                                                                             | 4633              |                    |
| 3             | "yoga"[Other Term]                                                                                 | 1388              |                    |
| 4             | "Yoga"[MeSH Terms] OR<br>"yoga"[Title/Abstract]                                                    | 5102              | 1 OR 2             |
| 5             | "Mindfulness"[MeSH Terms]                                                                          | 3071              |                    |
| 6             | "mindful*"[Title/Abstract]                                                                         | 9693              |                    |
| 7             | "mindful*"[Other Term]                                                                             | 3088              |                    |
| 8             | compassion[MeSH Terms]                                                                             | 0                 |                    |
| 9             | "Self-compassion"[MeSH Terms]                                                                      | 0                 |                    |
| 10            | "self-compassion"[Title/Abstract]                                                                  | 944               |                    |
| 11            | "self-compassion"[Other Term]                                                                      | 412               |                    |
| 12            | "mind-body therapies"[MeSH Terms]                                                                  | 50045             |                    |
| 13            | "Mindfulness"[MeSH Terms] OR<br>"mindful*"[Title/Abstract] OR<br>"self-compassion"[Title/Abstract] | 10507             | 5 OR 6<br>OR 10    |
| 14            | "Meditation"[MeSH Terms]                                                                           | 2790              |                    |
| 15            | "meditat*"[Title/Abstract]                                                                         | 6068              |                    |
| 16            | "meditat*"[Other Term]                                                                             | 1141              |                    |

|    |                                                                                                                                                                                                                                                                                                                   |        |                               |
|----|-------------------------------------------------------------------------------------------------------------------------------------------------------------------------------------------------------------------------------------------------------------------------------------------------------------------|--------|-------------------------------|
| 17 | contemplation[MeSH Terms]                                                                                                                                                                                                                                                                                         | 0      |                               |
| 18 | "contemplat*" [Title/Abstract]                                                                                                                                                                                                                                                                                    | 7800   |                               |
| 19 | "contemplative" [Title/Abstract]                                                                                                                                                                                                                                                                                  | 354    |                               |
| 20 | "contemplative" [Other Term]                                                                                                                                                                                                                                                                                      | 51     |                               |
| 21 | "contemplation*" [Title/Abstract]                                                                                                                                                                                                                                                                                 | 1446   |                               |
| 22 | "contemplation*" [Other Term]                                                                                                                                                                                                                                                                                     | 14     |                               |
| 23 | "Meditation" [MeSH Terms] OR<br>"meditat*" [Title/Abstract] OR<br>"contemplative" [Title/Abstract]<br>OR<br>"contemplation*" [Title/Abstract]                                                                                                                                                                     | 8582   | 14 OR<br>15 OR<br>19 OR<br>21 |
| 24 | "Yoga" [MeSH Terms] OR<br>"yoga" [Title/Abstract] OR<br>"Mindfulness" [MeSH Terms] OR<br>"mindful*" [Title/Abstract] OR<br>"self-compassion" [Title/Abstract]<br>OR "Meditation" [MeSH Terms] OR<br>"meditat*" [Title/Abstract] OR<br>"contemplative" [Title/Abstract]<br>OR<br>"contemplation*" [Title/Abstract] | 20363  | 4 OR 13<br>OR 23              |
| 25 | "child, preschool" [MeSH Terms]                                                                                                                                                                                                                                                                                   | 908054 |                               |
| 26 | "preschool*" [Title/Abstract]                                                                                                                                                                                                                                                                                     | 32984  |                               |
| 27 | "pre-school*" [Title/Abstract]                                                                                                                                                                                                                                                                                    | 4976   |                               |
| 28 | "child, preschool" [MeSH Terms]<br>OR "preschool*" [Title/Abstract]<br>OR "pre-school*" [Title/Abstract]                                                                                                                                                                                                          | 915527 |                               |
| 29 | childhood [MeSH Terms]                                                                                                                                                                                                                                                                                            | 0      |                               |
| 30 | "early child*" [Title/Abstract]                                                                                                                                                                                                                                                                                   | 27157  |                               |
| 31 | kindergarten [MeSH Terms]                                                                                                                                                                                                                                                                                         | 0      |                               |
| 32 | "kindergar*" [Title/Abstract]                                                                                                                                                                                                                                                                                     | 6680   |                               |
| 33 | "Child Care" [MeSH Terms]                                                                                                                                                                                                                                                                                         | 19506  |                               |
| 34 | child* care [Title/Abstract]                                                                                                                                                                                                                                                                                      | 238670 |                               |
| 35 | "child care" [Title/Abstract]                                                                                                                                                                                                                                                                                     | 7152   |                               |
| 36 | "children care" [Title/Abstract]                                                                                                                                                                                                                                                                                  | 119    |                               |
| 37 | "child day care" [Title/Abstract]                                                                                                                                                                                                                                                                                 | 296    |                               |
| 38 | "children day care" [Title/Abstract]                                                                                                                                                                                                                                                                              | 27     |                               |
| 39 | "child daycare" [Title/Abstract]                                                                                                                                                                                                                                                                                  | 106    |                               |
| 40 | children daycare [Title/Abstract]                                                                                                                                                                                                                                                                                 | 2518   |                               |
| 41 | "Child Care" [MeSH Terms] OR<br>"Child Care" [Title/Abstract] OR<br>"children care" [Title/Abstract] OR<br>"child day care" [Title/Abstract]<br>OR "children day                                                                                                                                                  | 25119  |                               |

|    |                                                                                                                                                                                                                                                                                                                                                                                                                                                                                                                                                                                                                                                                                                                                                 |        |                                        |
|----|-------------------------------------------------------------------------------------------------------------------------------------------------------------------------------------------------------------------------------------------------------------------------------------------------------------------------------------------------------------------------------------------------------------------------------------------------------------------------------------------------------------------------------------------------------------------------------------------------------------------------------------------------------------------------------------------------------------------------------------------------|--------|----------------------------------------|
|    | care"[Title/Abstract] OR "child daycare"[Title/Abstract]                                                                                                                                                                                                                                                                                                                                                                                                                                                                                                                                                                                                                                                                                        |        |                                        |
| 42 | "schools, nursery"[MeSH Terms]                                                                                                                                                                                                                                                                                                                                                                                                                                                                                                                                                                                                                                                                                                                  | 1461   |                                        |
| 43 | "nursery school*"[Title/Abstract]                                                                                                                                                                                                                                                                                                                                                                                                                                                                                                                                                                                                                                                                                                               | 1082   |                                        |
| 44 | "schools, nursery"[MeSH Terms]<br>OR "nursery school*"[Title/Abstract]                                                                                                                                                                                                                                                                                                                                                                                                                                                                                                                                                                                                                                                                          | 2124   |                                        |
| 45 | "child, preschool"[MeSH Terms]<br>OR "preschool*"[Title/Abstract]<br>OR "pre-school*"[Title/Abstract]<br>OR "early child*"[Title/Abstract]<br>OR "kindergar*"[Title/Abstract]<br>OR "Child Care"[MeSH Terms] OR<br>"Child Care"[Title/Abstract] OR<br>"children care"[Title/Abstract] OR<br>"child day care"[Title/Abstract]<br>OR "children day care"[Title/Abstract] OR "child daycare"[Title/Abstract] OR<br>"schools, nursery"[MeSH Terms]<br>OR "nursery school*"[Title/Abstract]                                                                                                                                                                                                                                                          | 951735 | 28 OR<br>30 OR<br>32 OR<br>41 OR<br>44 |
| 46 | ("Yoga"[MeSH Terms] OR<br>"yoga"[Title/Abstract] OR<br>"Mindfulness"[MeSH Terms] OR<br>"mindful*"[Title/Abstract] OR<br>"self-compassion"[Title/Abstract]<br>OR "Meditation"[MeSH Terms] OR<br>"meditat*"[Title/Abstract] OR<br>"contemplative"[Title/Abstract]<br>OR<br>"contemplation*"[Title/Abstract])<br>AND (((("child, preschool"[MeSH<br>Terms] OR<br>"preschool*"[Title/Abstract] OR<br>"pre-school*"[Title/Abstract]) OR<br>("early child*"[Title/Abstract]))<br>OR ("kindergar*"[Title/Abstract]))<br>OR ("Child Care"[MeSH Terms] OR<br>"Child Care"[Title/Abstract] OR<br>"children care"[Title/Abstract] OR<br>"child day care"[Title/Abstract]<br>OR "children day care"[Title/Abstract] OR "child daycare"[Title/Abstract])) OR | 255    | 24 AND<br>45                           |

|  |                                                                               |  |  |
|--|-------------------------------------------------------------------------------|--|--|
|  | ("schools, nursery"[MeSH Terms]<br>OR "nursery<br>school*" [Title/Abstract])) |  |  |
|--|-------------------------------------------------------------------------------|--|--|

Database: EMBASE

Host: EMBASE

Date Searched: May-13-2020

Searcher: Yaoyao Sun

Search Strategy:

| Search Number | Strategy                                                                                            | Records Retrieved | Number in website    |
|---------------|-----------------------------------------------------------------------------------------------------|-------------------|----------------------|
| 1             | 'yoga'/exp                                                                                          | 7572              |                      |
| 2             | yoga:ti,ab,kw                                                                                       | 6785              |                      |
| 3             | 'yoga'/exp OR yoga:ti,ab,kw                                                                         | 9221              | 1 OR 2               |
| 4             | 'mindfulness'/exp                                                                                   | 8045              |                      |
| 5             | mindful*:ti,ab,kw                                                                                   | 13045             |                      |
| 6             | 'compassion'/exp                                                                                    | 137               |                      |
| 7             | compassion:ti,ab,kw                                                                                 | 6879              |                      |
| 8             | 'self compassion'/exp                                                                               | 156               |                      |
| 9             | 'self compassion':ti,ab,kw                                                                          | 1067              |                      |
| 10            | ('compassion'/exp OR compassion:ti,ab,kw) NOT ('self compassion'/exp OR 'self compassion':ti,ab,kw) | 5835              |                      |
| 11            | 'mindfulness'/exp OR mindful*:ti,ab,kw OR 'self compassion'/exp OR 'self compassion':ti,ab,kw       | 15068             | 4 OR 5 OR 8 OR 9     |
| 12            | 'meditation'/exp                                                                                    | 7872              |                      |
| 13            | meditat*:ti,ab,kw                                                                                   | 8547              |                      |
| 14            | contemplat*:ti,ab,kw                                                                                | 10359             |                      |
| 15            | contemplative:ti,ab,kw                                                                              | 387               |                      |
| 16            | contemplation*:ti,ab,kw                                                                             | 1875              |                      |
| 17            | contemplat*:ti,ab,kw NOT (contemplative:ti,ab,kw OR contemplation*:ti,ab,kw)                        | 8122              |                      |
| 18            | 'meditation'/exp OR meditat*:ti,ab,kw OR contemplative:ti,ab,kw OR contemplation*:ti,ab,kw          | 13269             | 20 OR 21 OR 24 OR 25 |
| 19            | 'yoga'/exp OR yoga:ti,ab,kw OR 'mindfulness'/exp OR                                                 | 31256             | 3 OR 11 OR 18        |

|    |                                                                                                                                                                                                                                                                                      |        |                            |
|----|--------------------------------------------------------------------------------------------------------------------------------------------------------------------------------------------------------------------------------------------------------------------------------------|--------|----------------------------|
|    | mindful*:ti,ab,kw OR 'self compassion'/exp OR 'self compassion':ti,ab,kw OR 'meditation'/exp OR meditat*:ti,ab,kw OR contemplative:ti,ab,kw OR contemplation*:ti,ab,kw                                                                                                               |        |                            |
| 20 | 'preschool child'/exp                                                                                                                                                                                                                                                                | 616772 |                            |
| 21 | preschool*:ti,ab,kw                                                                                                                                                                                                                                                                  | 35667  |                            |
| 22 | 'pre-school*:ti,ab,kw                                                                                                                                                                                                                                                                | 6829   |                            |
| 23 | 'pre-school*:ti,ab,kw NOT ('preschool child'/exp OR preschool*:ab,ti,kw)                                                                                                                                                                                                             | 2196   |                            |
| 24 | 'preschool-child'/exp OR preschool*:ab,ti,kw OR 'pre-school*:ab,ti,kw                                                                                                                                                                                                                | 629999 |                            |
| 25 | 'early childhood'/exp                                                                                                                                                                                                                                                                | 22     |                            |
| 26 | 'early child*:ti,ab,kw                                                                                                                                                                                                                                                               | 34701  |                            |
| 27 | 'child care'/exp                                                                                                                                                                                                                                                                     | 52341  |                            |
| 28 | 'child* care':ti,ab,kw                                                                                                                                                                                                                                                               | 8042   |                            |
| 29 | 'child* day care':ti,ab,kw                                                                                                                                                                                                                                                           | 423    |                            |
| 30 | 'child* daycare':ti,ab,kw                                                                                                                                                                                                                                                            | 83     |                            |
| 31 | 'child* daycare':ti,ab,kw NOT 'child* day care':ti,ab,kw                                                                                                                                                                                                                             | 58     |                            |
| 32 | 'child care'/exp OR 'child* care':ti,ab,kw OR 'child* day care':ti,ab,kw OR 'child* daycare':ti,ab,kw                                                                                                                                                                                | 57158  |                            |
| 33 | 'kindergarten'/exp                                                                                                                                                                                                                                                                   | 2739   |                            |
| 34 | kindergar*:ti,ab,kw                                                                                                                                                                                                                                                                  | 7800   |                            |
| 35 | 'nursery school'/exp                                                                                                                                                                                                                                                                 | 1483   |                            |
| 36 | 'nursery school*:ti,ab,kw                                                                                                                                                                                                                                                            | 1395   |                            |
| 37 | 'nursery school'/exp OR 'nursery school*:ab,ti,kw                                                                                                                                                                                                                                    | 2318   |                            |
| 38 | 'preschool child'/exp OR preschool*:ab,ti,kw OR 'pre-school*:ab,ti,kw OR 'early child*:ti,ab,kw OR 'child care'/exp OR 'child* care':ti,ab,kw OR 'child* day care':ti,ab,kw OR 'child* daycare':ti,ab,kw OR kindergar*:ti,ab,kw OR 'nursery school'/exp OR 'nursery school*:ab,ti,kw | 702413 | 24 OR 26 OR 32 OR 34 OR 37 |

|    |                                                                                                                                                                                                                                                                                                                                                                                                                                                                                                                         |     |           |
|----|-------------------------------------------------------------------------------------------------------------------------------------------------------------------------------------------------------------------------------------------------------------------------------------------------------------------------------------------------------------------------------------------------------------------------------------------------------------------------------------------------------------------------|-----|-----------|
| 51 | (‘yoga’/exp OR yoga:ti,ab,kw OR ‘mindfulness’/exp OR mindful*:ti,ab,kw OR ‘self compassion’/exp OR ‘self compassion’:ti,ab,kw OR ‘meditation’/exp OR meditat*:ti,ab,kw OR contemplative:ti,ab,kw OR contemplation*:ti,ab,kw) AND (‘preschool child’/exp OR preschool*:ab,ti,kw OR ‘pre-school’:ab,ti,kw OR ‘early child’:ti,ab,kw OR ‘child care’/exp OR ‘child* care’:ti,ab,kw OR ‘child* day care’:ti,ab,kw OR ‘child* daycare’:ti,ab,kw OR kindergar*:ti,ab,kw OR ‘nursery school’/exp OR ‘nursery school’:ab,ti,kw) | 317 | 19 AND 38 |
|----|-------------------------------------------------------------------------------------------------------------------------------------------------------------------------------------------------------------------------------------------------------------------------------------------------------------------------------------------------------------------------------------------------------------------------------------------------------------------------------------------------------------------------|-----|-----------|

Database: PsychInfo

Host: EBSCO

Date Searched: May-13-2020

Searcher: Renee Lamoreau

Search Strategy:

| Search Number | Strategy                       | Records Retrieved | Number in website |
|---------------|--------------------------------|-------------------|-------------------|
| 1             | SU Yoga                        | 2,069             | S1                |
| 2             | TI Yoga OR AB Yoga             | 2,726             | S2                |
| 3             | SU Yoga OR TI Yoga OR AB Yoga  | <b>2,961</b>      | S3                |
| 4             | TI Yoga or AB Yoga NOT SU Yoga | 884               | S4                |
| 5             | SU Yoga NOT TI/AB Yoga         | 227               | S5                |
| 6             | KW Yoga                        | 1,731             | S6                |

|    |                                                                          |        |     |
|----|--------------------------------------------------------------------------|--------|-----|
| 7  | KW Yoga OR SU Yoga OR<br>AB Yoga OR TI Yoga                              | 2,953  | S7  |
| 8  | KW Yoga NOT (SU Yoga<br>OR AB Yoga OR TI Yoga)                           | 0      | S8  |
| 9  | SU mindful*                                                              | 10,996 | S9  |
| 10 | TI mindful*                                                              | 8,468  | S10 |
| 11 | AB mindful*                                                              | 14,881 | S11 |
| 12 | SU Mindful* OR TI<br>mindful* OR AB<br>mindful*                          | 15,828 | S12 |
| 13 | KW mindful*                                                              | 10,154 | S13 |
| 14 | KW mindful* NOT (SU<br>Mindfulness OR TI<br>mindful* OR AB<br>mindful* ) | 4      | S14 |
| 15 | SU self-compassion                                                       | 1,153  | S15 |
| 16 | TI self-compassion                                                       | 945    | S16 |
| 17 | AB self-compassion                                                       | 1,666  | S17 |
| 18 | SU self-compassion OR TI<br>self-compassion OR AB<br>self-compassion     | 1,726  | S18 |
| 19 | SU meditat*                                                              | 5,507  | S19 |
| 20 | TI meditat*                                                              | 3,126  | S20 |
| 21 | AB meditat*                                                              | 8,325  | S21 |
| 22 | SU meditat* OR TI<br>meditat* OR AB<br>meditat*                          | 9,642  | S22 |
| 23 | TI contemplat*                                                           | 530    | S23 |

|    |                                                                                                                                                                                               |            |     |
|----|-----------------------------------------------------------------------------------------------------------------------------------------------------------------------------------------------|------------|-----|
| 24 | TI contemplat* OR AB<br>contemplat* OR KW<br>Contemplat*                                                                                                                                      | 6,814      | S24 |
| 25 | SU Preschool* OR SU Pre-<br>School* OR TI Preschool*<br>OR AB Preschool* OR TI<br>Pre-School* or AB Pre-<br>School*                                                                           | 103,295    | S25 |
| 26 | SU Kindergar* OR TI<br>Kindergar* OR AB<br>Kindergar*                                                                                                                                         | 21,379     | S26 |
| 27 | SU "Early childhood" OR<br>TI "Early childhood" OR<br>AB "Early childhood"                                                                                                                    | 32,419     | S27 |
| 28 | SU ( Daycare OR "Day<br>Care" ) OR TI ( Daycare<br>OR "Day Care" ) OR AB (<br>Daycare OR "Day Care" )                                                                                         | 8,205      | S28 |
| 29 | SU ( Childcare OR "Child<br>Care" ) OR TI ( Childcare<br>OR "Child Care" ) OR AB (<br>Childcare OR "Child Care"<br>)                                                                          | 19,919     | S29 |
| 32 | SU ( "nursery school*" OR<br>"nursery school<br>students" ) OR TI ( "<br>nursery school*" OR<br>"nursery school students"<br>) OR AB ( "nursery<br>school*" OR "nursery<br>school students" ) | 2,960      | S32 |
| 30 | S25 OR S26 OR S27 OR<br>S28 OR S29                                                                                                                                                            | 159,212    | S30 |
| 31 | FINAL SEARCH<br><br>S30 AND (S3 OR S12 OR<br>S18 OR S22 OR S24)                                                                                                                               | <b>368</b> | S31 |

Database: ERIC  
Host: EBSCO



Date Searched: May-13-2020

Searcher: Renee Lamoreau

Search Strategy:

| Search Number | Strategy                                  | Records Retrieved | Number in website |
|---------------|-------------------------------------------|-------------------|-------------------|
| 1             | SU Yoga                                   | 0                 | S1                |
| 2             | TI Yoga OR AB Yoga                        | 252               | S2                |
| 3             | KW Yoga                                   | 41                | S3                |
| 4             | TI Yoga OR AB Yoga OR KW YOGA             | 259               | S4                |
| 5             | SU Mindfulness                            | 0                 | S5                |
| 6             | TI mindful*                               | 715               | S6                |
| 7             | AB mindful*                               | 1,686             | S7                |
| 8             | KW mindful* OR TI mindful* OR AB mindful* | 1,741             | S8                |
| 9             | KW mindful*                               | 6                 | S9                |
| 10            | KW self-compassion                        | 0                 | S10               |
| 11            | TI self-compassion                        | 62                | S11               |
| 12            | AB self-compassion                        | 97                | S12               |
| 13            | TI self-compassion OR AB self-compassion  | 97                | S13               |
| 14            | SU meditation OR KW meditat*              | 180               | S14               |
| 15            | TI meditat*                               | 260               | S15               |
| 16            | AB meditat*                               | 781               | S16               |
| 17            | SU meditation OR KW meditat*OR TI         | 906               | S17               |

|    |                                                                                                                |         |     |
|----|----------------------------------------------------------------------------------------------------------------|---------|-----|
|    | meditat* OR AB<br>meditat*                                                                                     |         |     |
| 18 | TI contemplat*                                                                                                 | 173     | S18 |
| 19 | TI contemplat* OR AB<br>contemplat* OR KW<br>contemplat*                                                       | 1,886   | S19 |
| 20 | SU Preschool OR TI<br>Preschool OR AB<br>Preschool                                                             | 50,013  | S20 |
| 21 | SU Kindergar* OR TI<br>Kindergar* OR AB<br>Kindergar*                                                          | 25,224  | S21 |
| 22 | SU "Early child*" OR TI<br>"Early child*" OR AB<br>"Early child*"                                              | 55,435  | S22 |
| 23 | SU ( Daycare OR "Day<br>Care" ) OR TI ( Daycare<br>OR "Day Care" ) OR AB ( Daycare OR "Day Care" )             | 10,449  | S23 |
| 24 | SU ( Childcare OR "Child<br>Care" ) OR TI ( Childcare<br>OR "Child Care" ) OR AB ( Childcare OR "Child Care" ) | 14,961  | S24 |
| 25 | S20 OR S21 OR S22 OR<br>S23 OR S24                                                                             | 106,930 | S25 |
| 26 | FINAL SEARCH<br><br>S25 AND (S3 OR S12 OR<br>S18 OR S22 OR S24)                                                | 207     | S26 |

Database: Cochrane  
 Host: Cochrane Library  
 Date Searched: Apr-14-2020  
 Searcher: Raquel Horlick

Search Strategy:

| Search Number | Strategy                                                                                                                                                 | Records Retrieved | Number combination |
|---------------|----------------------------------------------------------------------------------------------------------------------------------------------------------|-------------------|--------------------|
| 1             | "Yoga"[MeSH Terms]                                                                                                                                       | 633               |                    |
| 2             | (yoga):ti,ab,kw                                                                                                                                          | 3026              |                    |
| 3             | "Yoga"[MeSH Terms] NOT (yoga):ti,ab,kw                                                                                                                   | 0                 |                    |
| 4             | (yoga):ti,ab,kw                                                                                                                                          | 3026              | 2                  |
| 5             | "Mindfulness"[MeSH Terms]                                                                                                                                | 749               |                    |
| 6             | (mindful*):ti,ab,kw                                                                                                                                      | 4862              |                    |
| 7             | "Mindfulness"[MeSH Terms] NOT (mindful*):ti,ab,kw                                                                                                        | 0                 |                    |
| 8             | ("self compassion"):ti,ab,kw                                                                                                                             | 431               |                    |
| 9             | (mindful*):ti,ab,kw OR ("self compassion"):ti,ab,kw                                                                                                      | 5012              | 6 OR 8             |
| 10            | "Meditation"[MeSH Terms]                                                                                                                                 | 575               |                    |
| 11            | (mediat*):ti,ab,kw                                                                                                                                       | 34851             |                    |
| 12            | (meditation):ti,ab,kw                                                                                                                                    | 2569              |                    |
| 13            | (contemplation*):ti,ab,kw                                                                                                                                | 275               |                    |
| 14            | (contemplative):ti,ab,kw                                                                                                                                 | 59                |                    |
| 15            | (meditation):ti,ab,kw OR (contemplation*):ti,ab,kw OR (contemplative):ti,ab,kw                                                                           | 2876              | 12 OR 13 OR 14     |
| 16            | (yoga):ti,ab,kw OR (mindful*):ti,ab,kw OR ("self compassion"):ti,ab,kw OR (meditation):ti,ab,kw OR (contemplation*):ti,ab,kw OR (contemplative):ti,ab,kw | 8842              | 4 OR 9 OR 15       |
| 17            | "child, preschool"[MeSH Terms]                                                                                                                           | 1172              |                    |
| 18            | (preschool*):ti,ab,kw                                                                                                                                    | 36633             |                    |
| 19            | (pre-school*):ti,ab,kw                                                                                                                                   | 646               |                    |
| 20            | (preschool*):ti,ab,kw OR (pre-school*):ti,ab,kw                                                                                                          | 36641             |                    |
| 21            | ("early child*"):ti,ab,kw                                                                                                                                | 134               |                    |
| 22            | (kindergar*):ti,ab,kw                                                                                                                                    | 667               |                    |
| 23            | "Child Care"[MeSH Terms]                                                                                                                                 | 801               |                    |
| 24            | ("child care"):ti,ab,kw                                                                                                                                  | 1227              |                    |
| 25            | ("child day care"):ti,ab,kw                                                                                                                              | 250               |                    |
| 26            | ("child daycare"):ti,ab,kw                                                                                                                               | 10                |                    |

|    |                                                                                                                                                                                                                                                                                                                                                                                                |       |                                        |
|----|------------------------------------------------------------------------------------------------------------------------------------------------------------------------------------------------------------------------------------------------------------------------------------------------------------------------------------------------------------------------------------------------|-------|----------------------------------------|
| 27 | ("child care"):ti,ab,kw OR ("child day care"):ti,ab,kw OR ("child daycare"):ti,ab,kw                                                                                                                                                                                                                                                                                                           | 1413  |                                        |
| 28 | "schools, nursery"[MeSH Terms]                                                                                                                                                                                                                                                                                                                                                                 | 37    |                                        |
| 29 | ("nursery school*"):ti,ab,kw                                                                                                                                                                                                                                                                                                                                                                   | 55    |                                        |
| 30 | (preschool*):ti,ab,kw OR (pre-school*):ti,ab,kw OR ("early child*"):ti,ab,kw OR (kindergar*):ti,ab,kw OR ("child care"):ti,ab,kw OR ("child day care"):ti,ab,kw OR ("child daycare"):ti,ab,kw OR ("nursery school*"):ti,ab,kw                                                                                                                                                                  | 37844 | 20 OR<br>21 OR<br>22 OR<br>27 OR<br>29 |
| 31 | ((yoga):ti,ab,kw OR (mindful*):ti,ab,kw OR ("self compassion"):ti,ab,kw OR (meditation):ti,ab,kw OR (contemplation*):ti,ab,kw OR (contemplative):ti,ab,kw) AND ((preschool*):ti,ab,kw OR (pre-school*):ti,ab,kw OR ("early child*"):ti,ab,kw OR (kindergar*):ti,ab,kw OR ("child care"):ti,ab,kw OR ("child day care"):ti,ab,kw OR ("child daycare"):ti,ab,kw OR ("nursery school*"):ti,ab,kw) | 51    | 16 AND<br>30                           |

The following supplemental searches were undertaken in American Mindfulness Research Association on 04/29/2020.

Retrieved related results.

| Search Number | Strategy   | Records retrieved | Notes                                                  | Chosen Articles |
|---------------|------------|-------------------|--------------------------------------------------------|-----------------|
| 1             | Preschool  | 15                | Including "preschools", "preschooler", "preschoolers". |                 |
| 2             | Pre-school | 1                 |                                                        |                 |
| 3             | child      | 269               | Including "children",                                  |                 |
| 4             | kindergar  | 2                 |                                                        |                 |
| 5             | nursery    | 0                 |                                                        |                 |
| 6             | kid        | 7                 |                                                        |                 |
