# Supplementary figures and images for: Yoga and Mindfulness Interventions for Preschool-Aged Children in Educational Settings: A Systematic Review
Source: MDPI journal article supplement (doi:10.3390/ijerph18116091), 2021-06-05

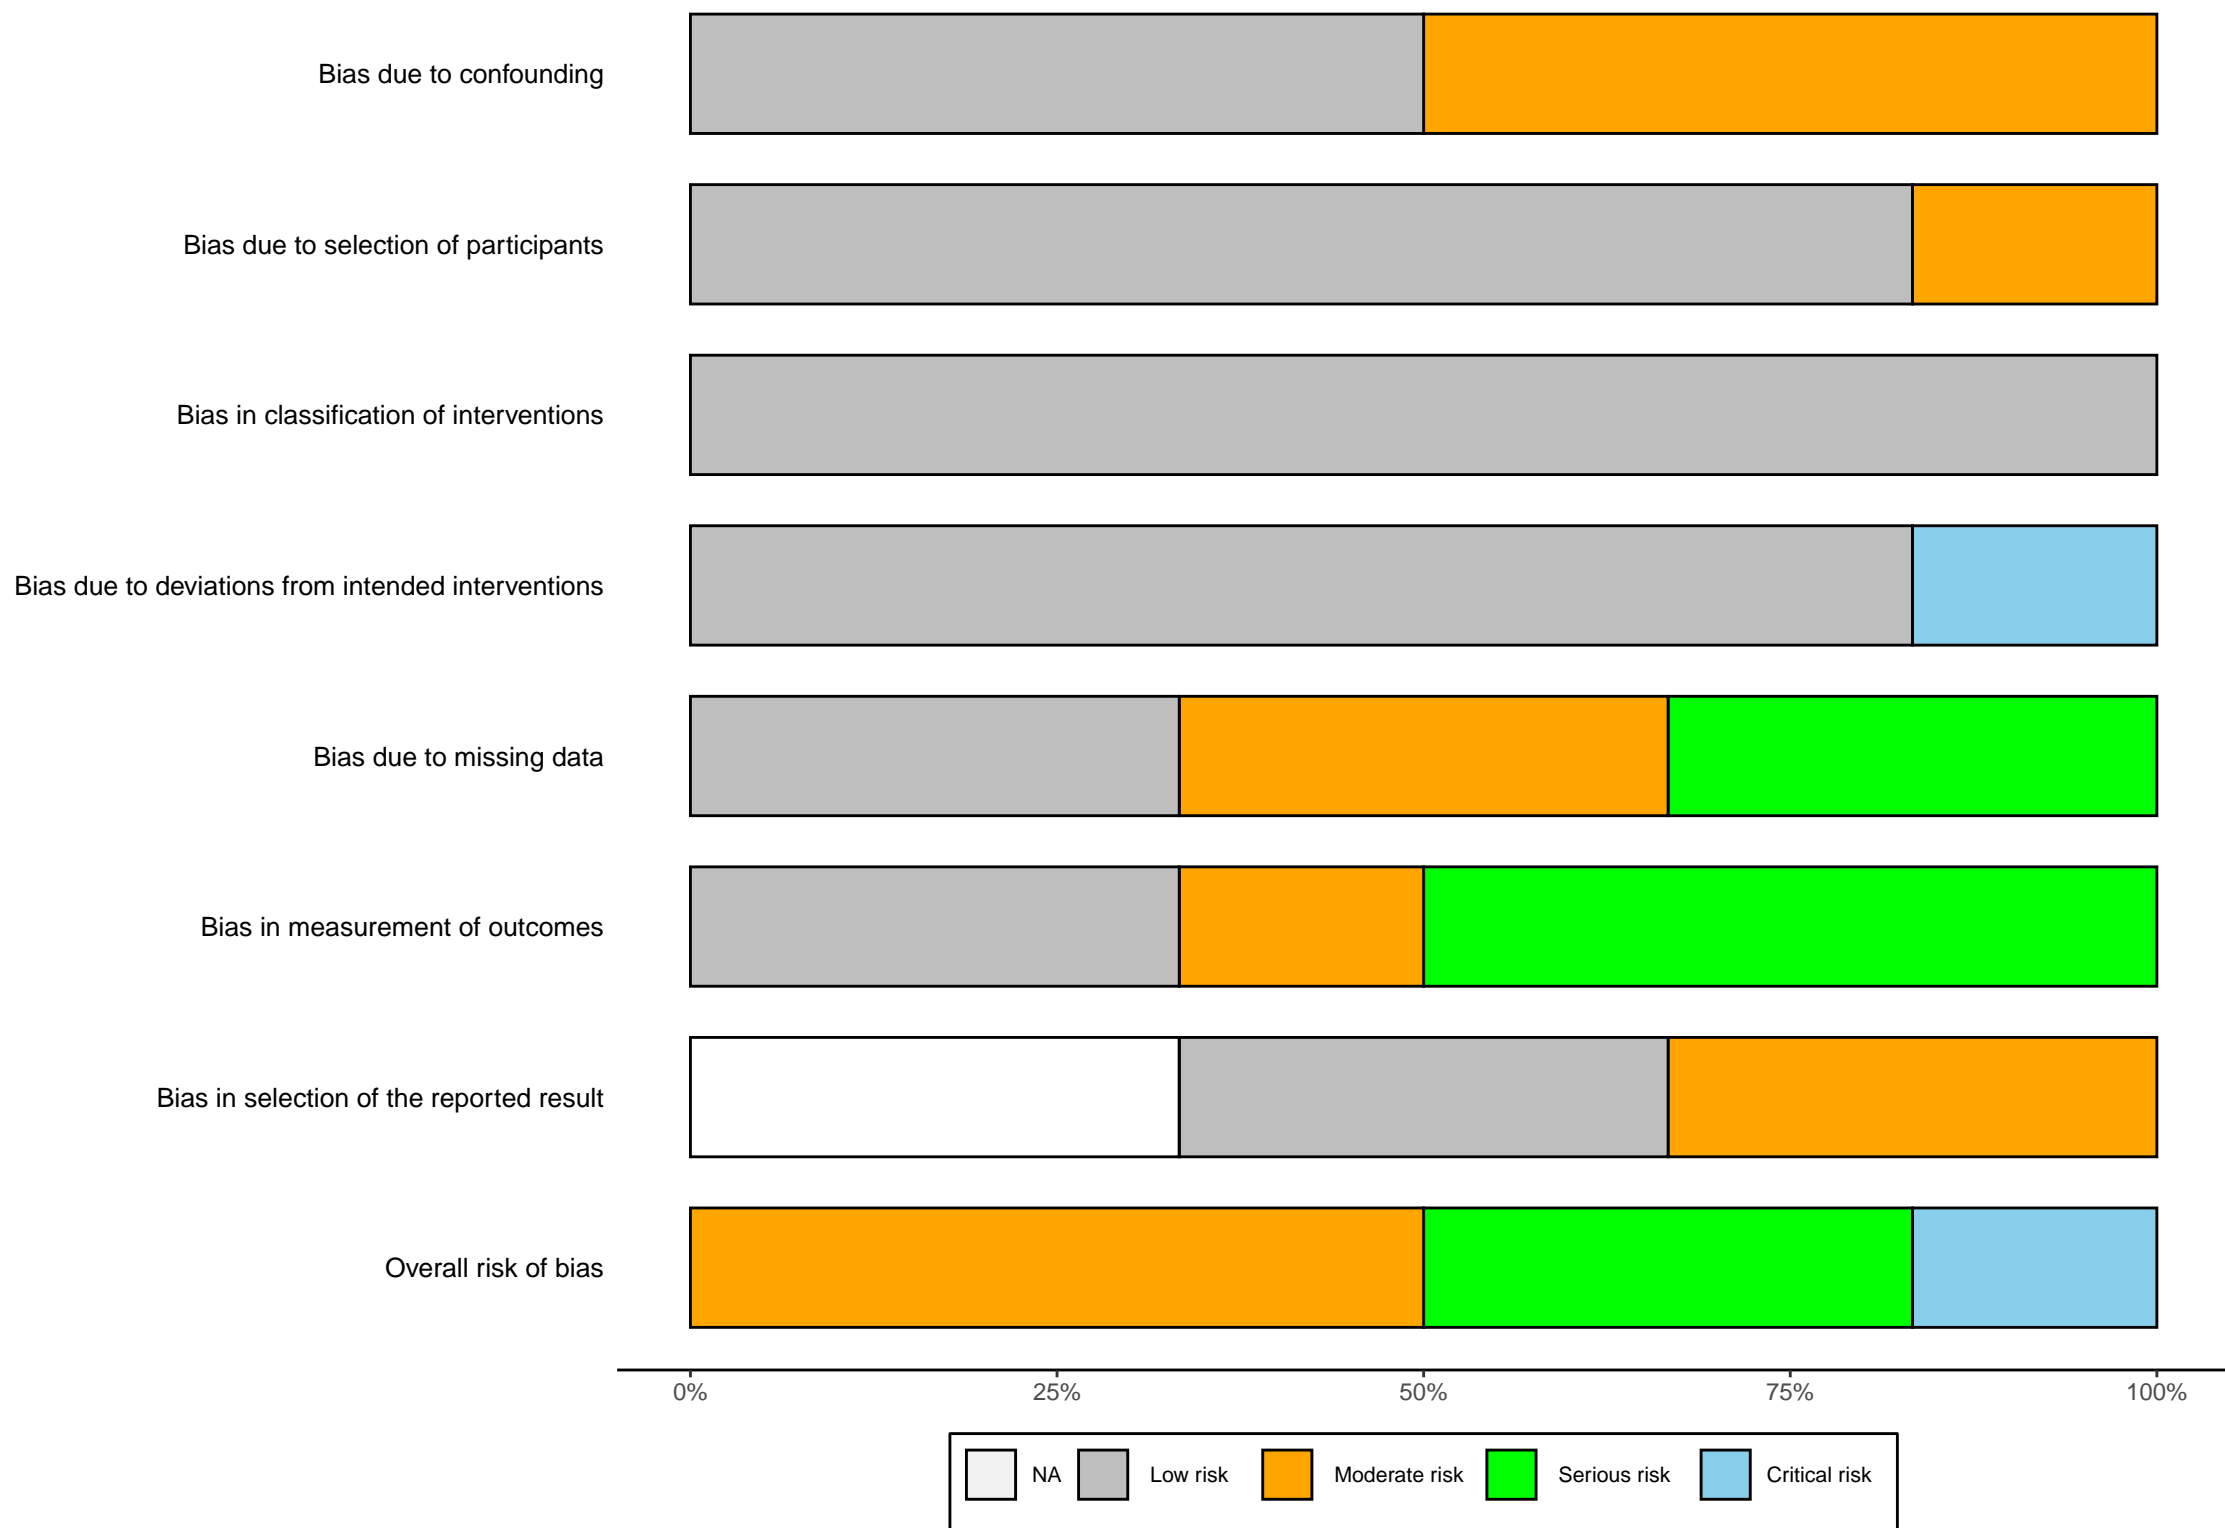

Supplement: s1 [file s1]

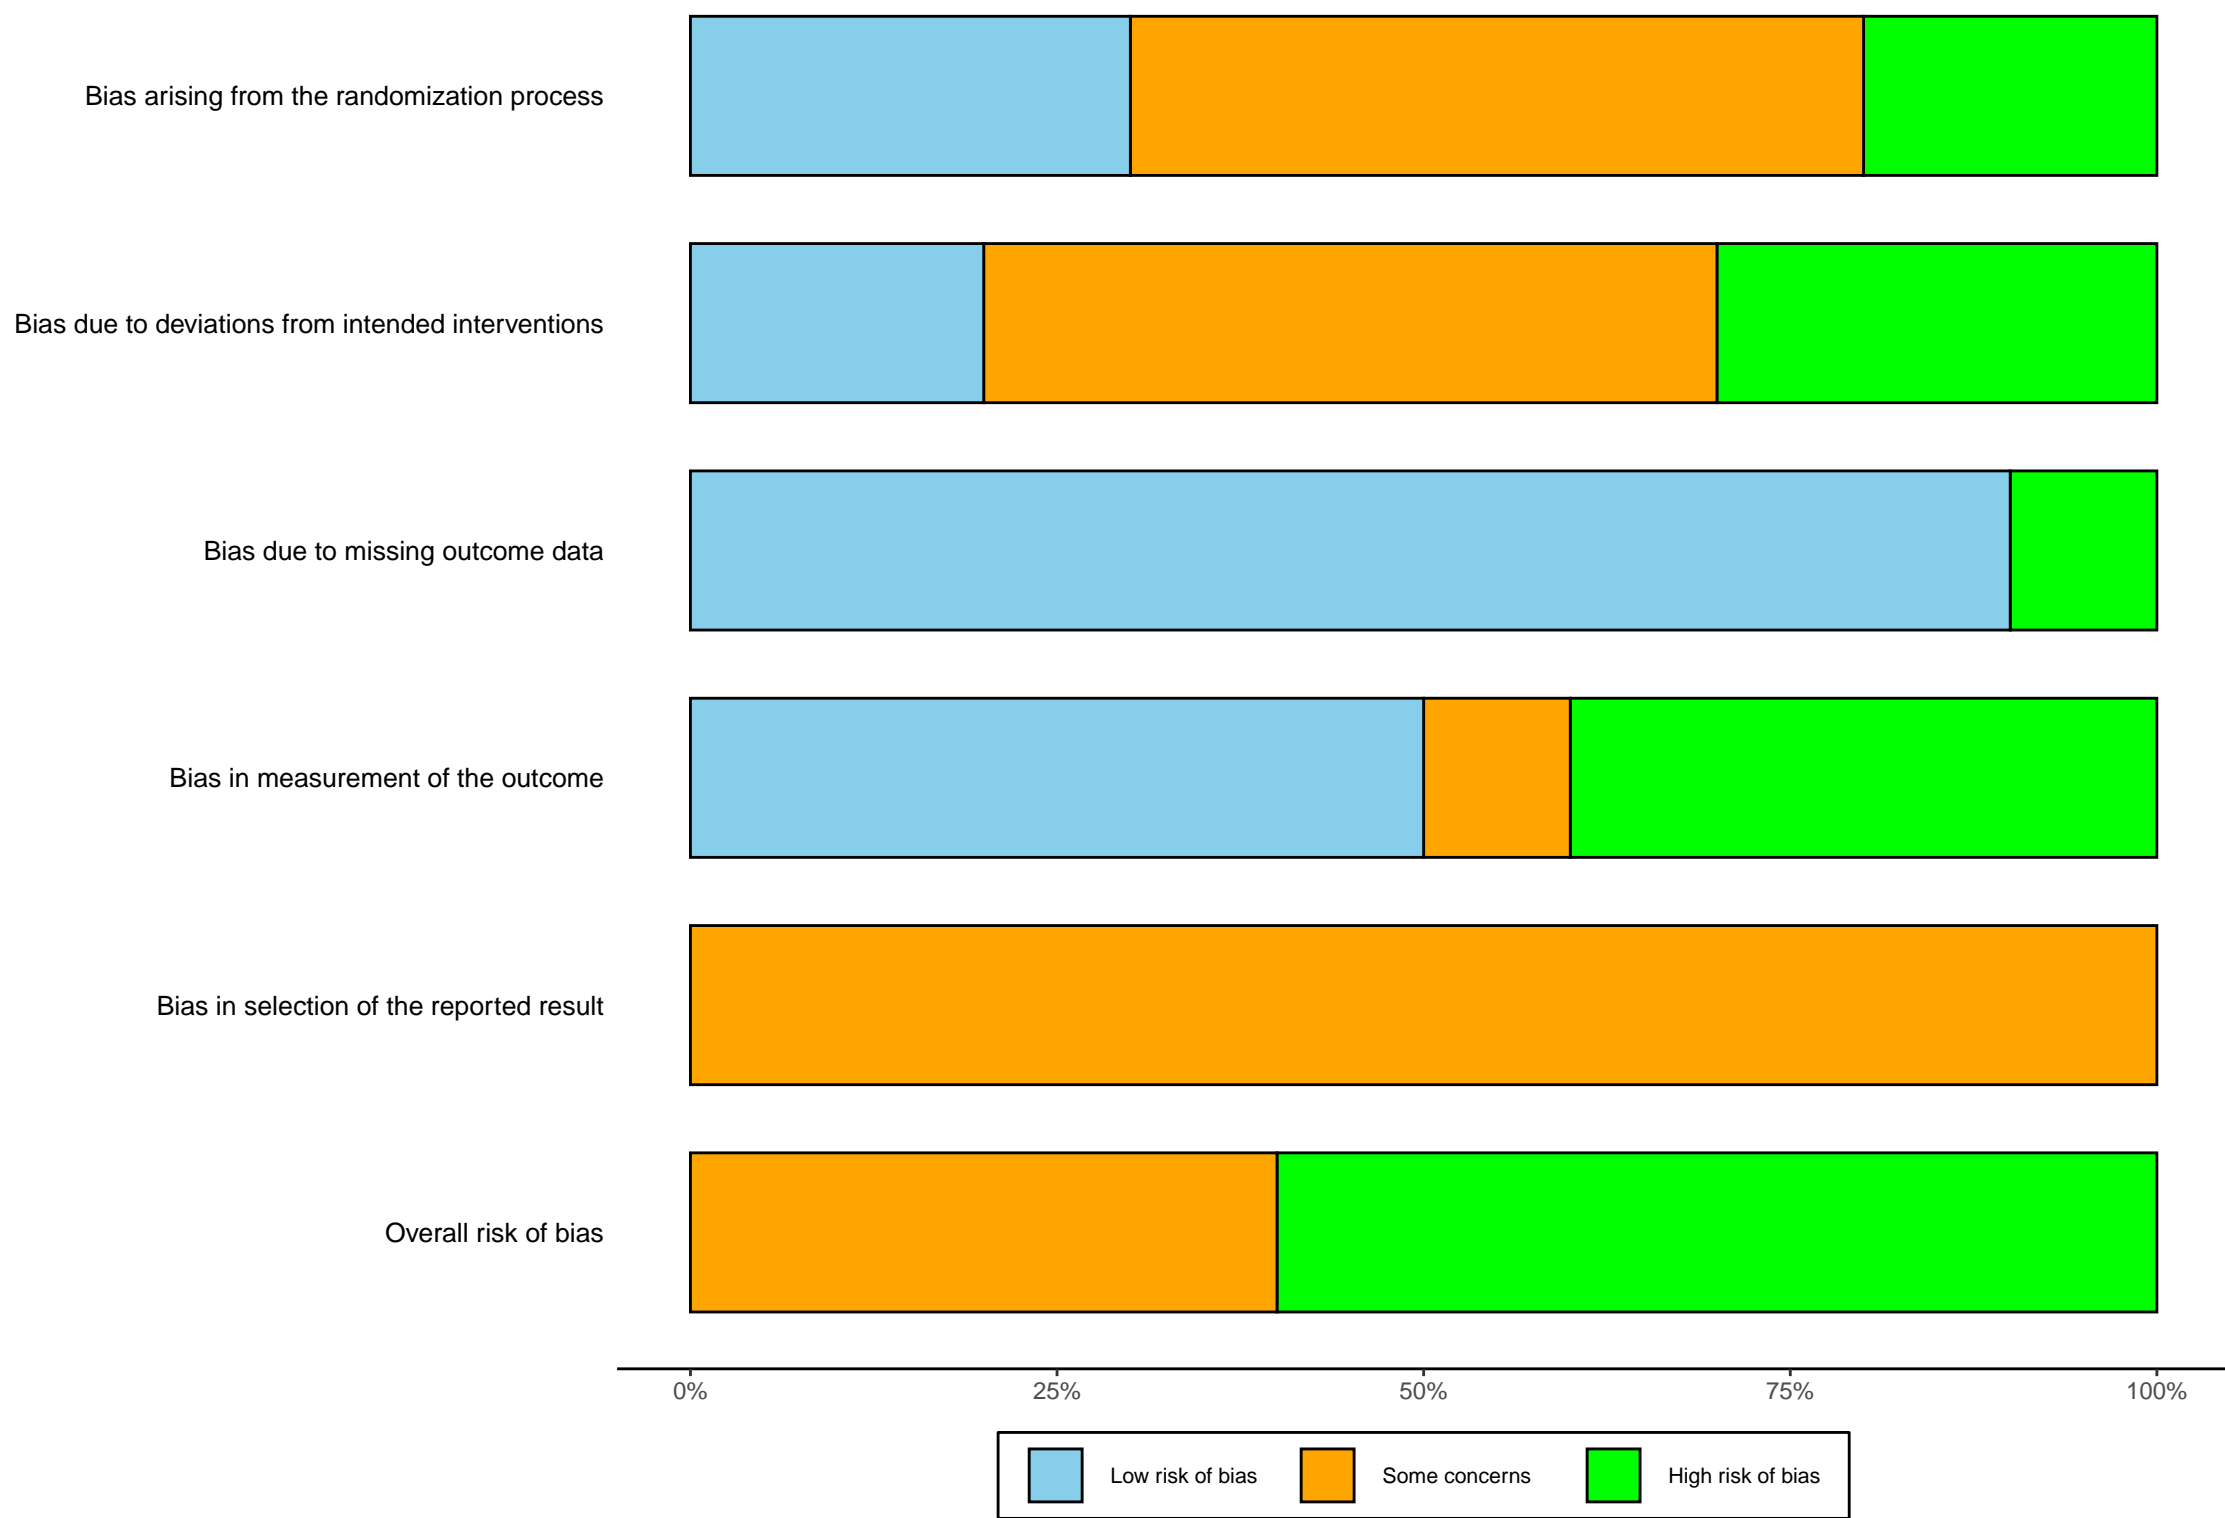

Supplement: s1 [file s1]
